# Supplementary material for: Structure–reactivity relations in Cu/ZrO2 catalysed glycerol dehydration to acetol in continuous flow
Source: Royal Society of Chemistry journal article supplement (doi:10.1039/d4cy00220b), 2024-01-01
Supplement: d4cy00220b1.pdf [file d4cy00220b1.pdf]

## SUPPORTING INFORMATION

### Structure-reactivity relations in Cu/ZrO<sub>2</sub> catalysed glycerol dehydration to acetol in continuous flow

Jaime Mazarío<sup>1</sup>, Deshetti Jampaiah<sup>2</sup>, Patricia Concepción<sup>1</sup>, Pablo Villasante-Iturria<sup>1</sup>, Karen Wilson<sup>3</sup>, Adam Lee<sup>3</sup>, Marcelo E. Domine<sup>1\*</sup>

<sup>1</sup> Instituto de Tecnología Química (UPV – CSIC). Universitat Politècnica de València. Consejo Superior de Investigaciones Científicas. Avda. Los Naranjos S/N, 46022, Valencia, Spain.

<sup>2</sup> School of Science, RMIT University, Melbourne VIC3000, Australia

<sup>3</sup> Centre for Catalysis and Clean Energy, School of Environment and Science, Griffith University, Gold Coast QLD 4222, Australia.

\*E-mail: [mdomine@itq.upv.es](mailto:mdomine@itq.upv.es)

#### Reactor operation

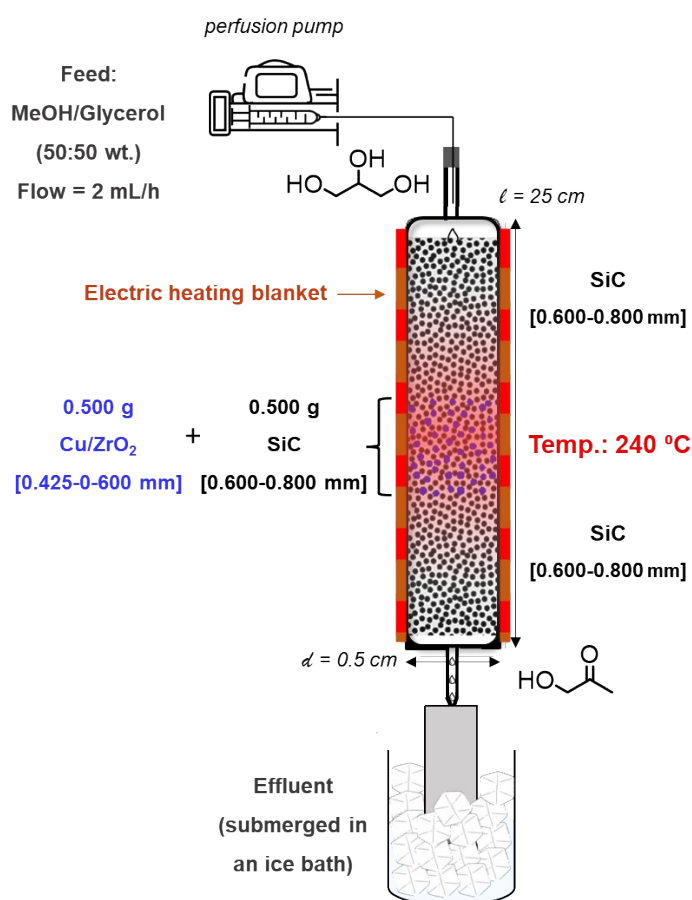

Figure S1. Schematic of continuous flow reactor for the selective dehydration of glycerol into acetol.

Diagnostic tests (**Figure S2a-b**) were selected according to reference 1 to assess internal and external diffusional limitations. The following conditions were thus selected to ensure that experiments were free from such limitations: feed (F) = 2 mL/h, WHSV [(glycerol mass·h<sup>-1</sup>/catalyst mass)] = 1.99 h<sup>-1</sup>, and particle size (D<sub>p</sub>) = 0.425-0.600 mm.

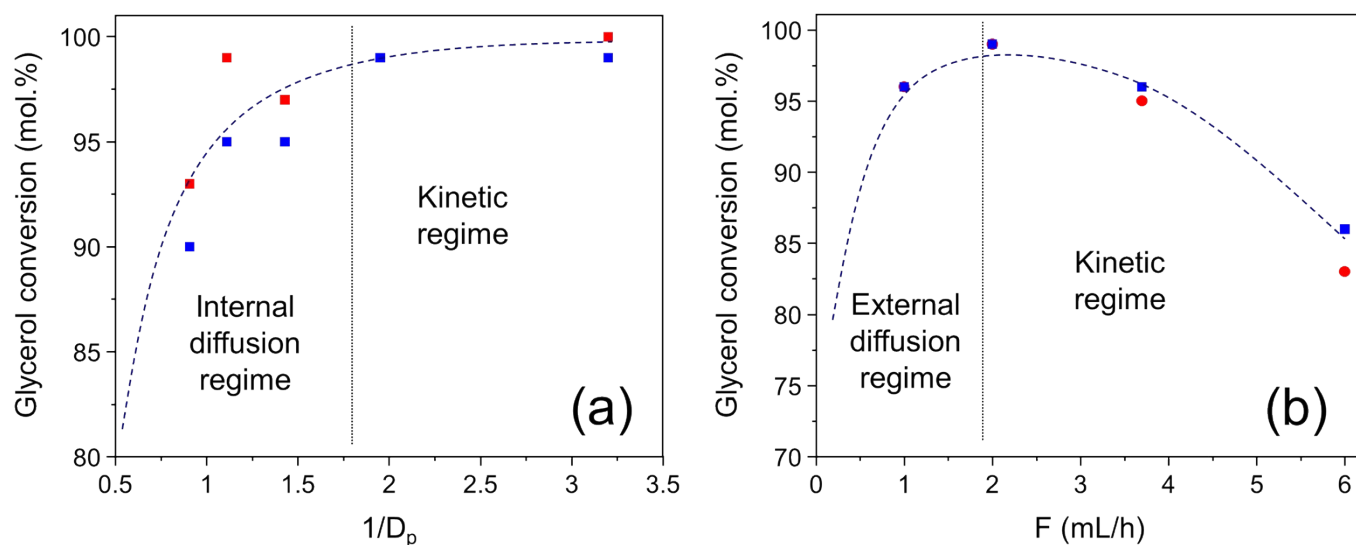

**Figure S2.** (a) Internal diffusion test: feed = methanol:glycerol (50:50 wt%), F = 2 ml/h, 0.5 g of Cu/*m*-ZrO<sub>2</sub>, 240 °C. (b) External diffusion test: feed = methanol:glycerol (50:50 wt%), Cu/*m*-ZrO<sub>2</sub>, 240 °C, D<sub>p</sub> = 0.425-0.600 mm. In both tests, data are reported for time-on-stream = 1-2 h (**blue**) or 2-3 h (**red**).

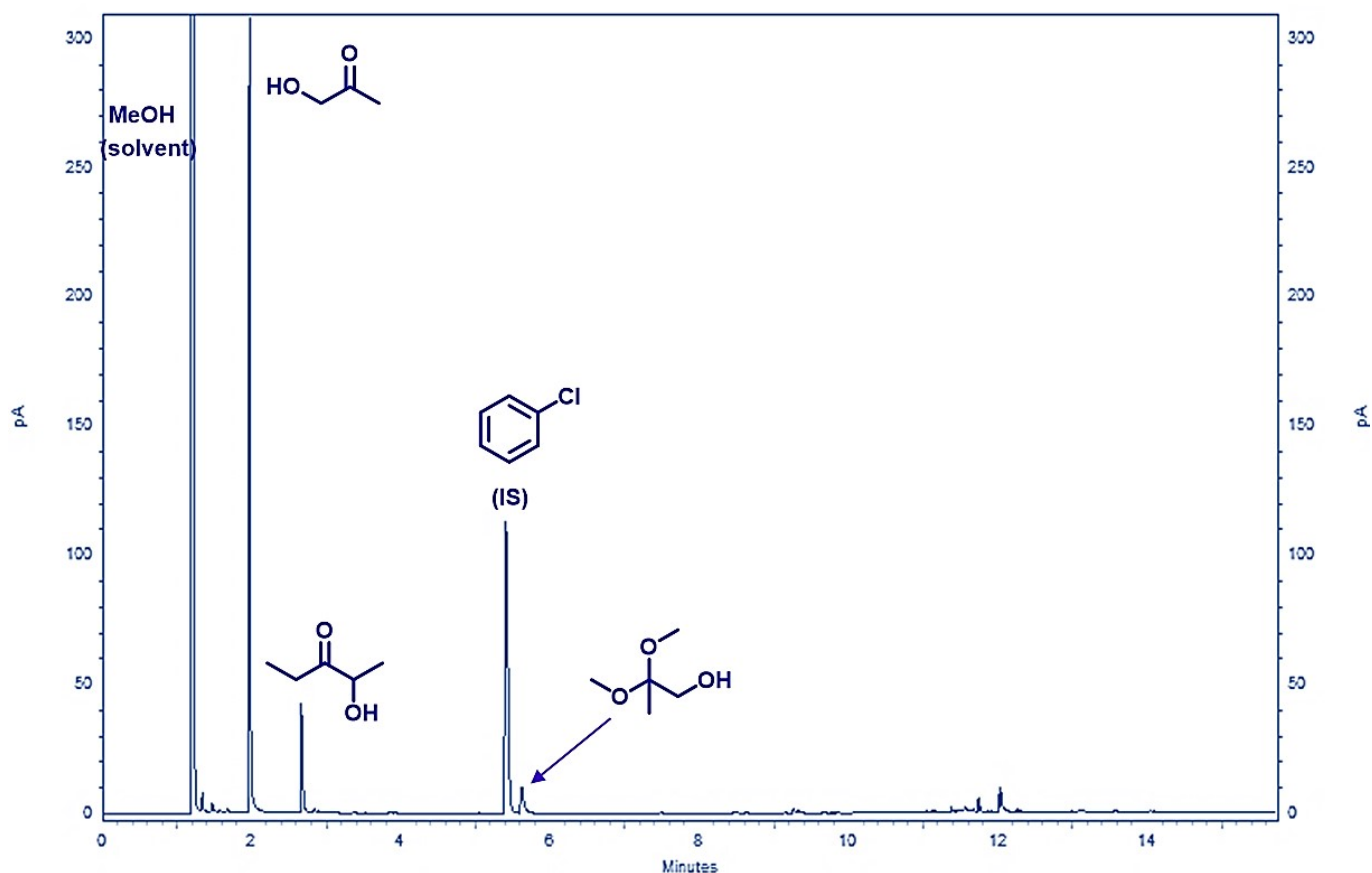

**Figure S3.** Gas chromatogram from Agilent Technologies 7890A GC, equipped with FID and HP-5 MS capillary column (30m x 250µm x 0.25µm) after 7-8 h time-on-stream. Reaction conditions: feed = methanol:glycerol (50:50 wt%), F = 2 ml/h, 0.500 g Cu/*m*-ZrO<sub>2</sub>, 240 °C.

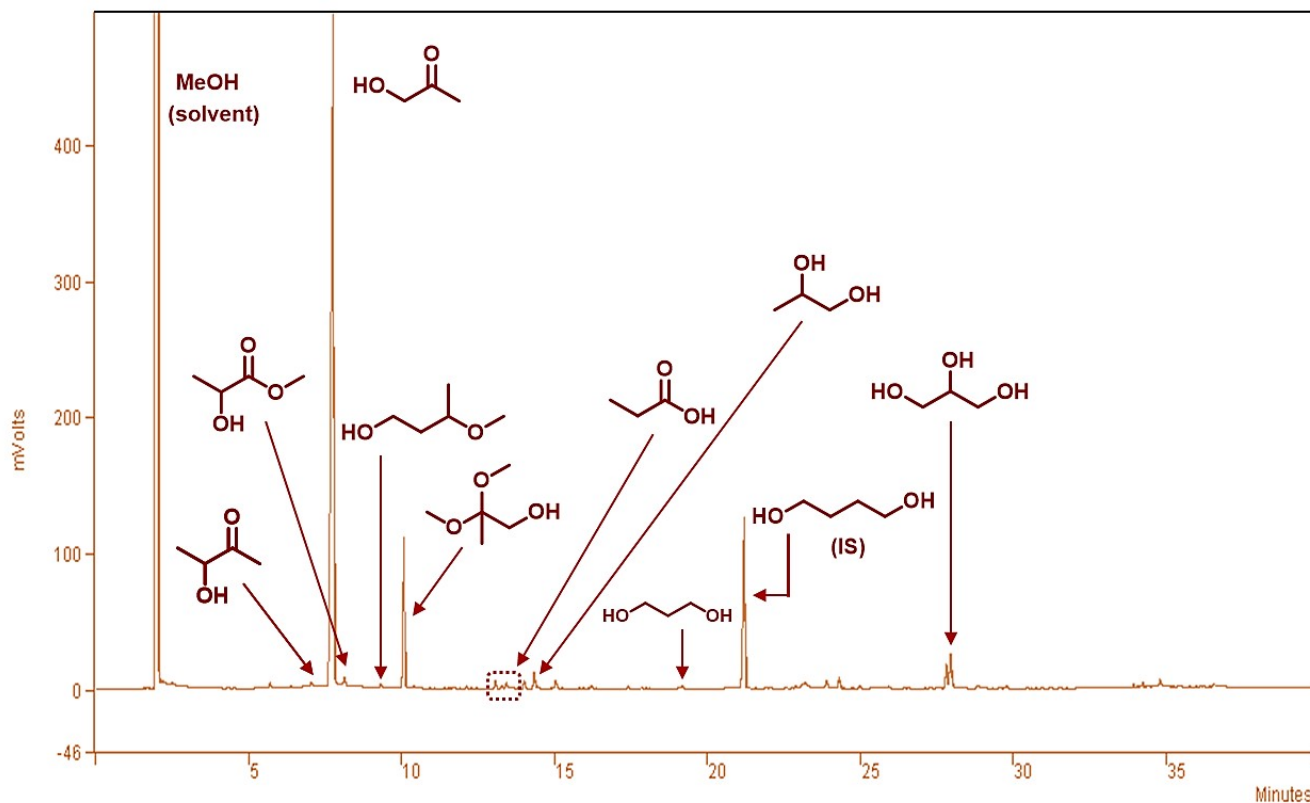

**Figure S4.** Gas chromatogram from Varian CP-3800 GC, equipped with FID detector and CARBOWAX Column (15 m x 3.2 mm) after 7-8 h time-on-stream. Reaction conditions: feed = methanol:glycerol (50:50 wt%), F = 2 ml/h, 0.500 g Cu/*m*-ZrO<sub>2</sub>, 240 °C.

## Catalyst characterisation

**Table S1.** Textural properties of ZrO<sub>2</sub> supports from N<sub>2</sub> physisorption.

| ZrO <sub>2</sub> phase | Commercial supplier | Code                       | BET area (m <sup>2</sup> /g) <sup>a</sup> | Pore volume (cm <sup>3</sup> /g) <sup>a</sup> | Average pore diameter <sup>b</sup> (nm) |
|------------------------|---------------------|----------------------------|-------------------------------------------|-----------------------------------------------|-----------------------------------------|
| Monoclinic             | Chempur             | <i>m</i> -ZrO <sub>2</sub> | 102                                       | 0.28                                          | 8.0                                     |
| Tetragonal             | Chempur             | <i>t</i> -ZrO <sub>2</sub> | 138                                       | 0.20                                          | 3.8                                     |

<sup>a</sup>BET method. <sup>b</sup>BJH method applied to desorption isotherm.

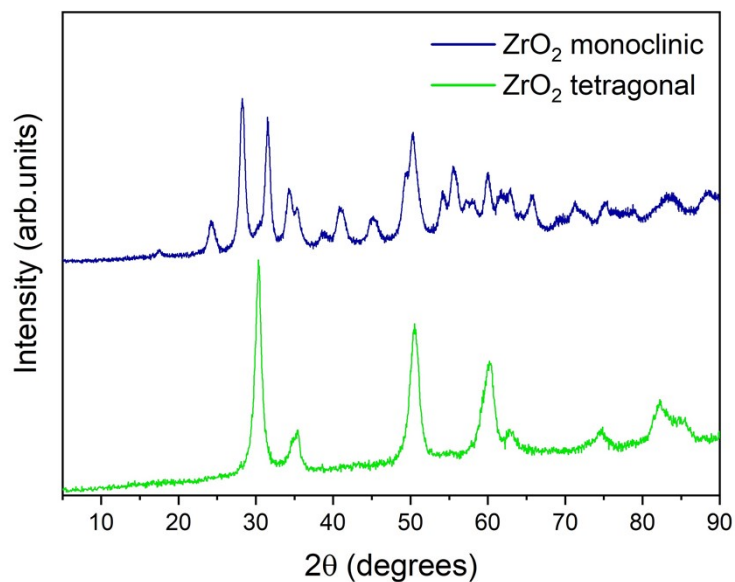

**Figure S5.** Powder X-ray diffraction patterns of commercial ZrO<sub>2</sub> supports.

**Table S2.** Textural properties of copper phase.<sup>a</sup>

| <b>Catalyst</b>                | <b>Cu dispersion<br/>/ %</b> | <b>Surface area<br/>Cu metal<br/>/ m<sup>2</sup>.g<sup>-1</sup></b> | <b>Mean particle diameter<br/>/ nm</b> |
|--------------------------------|------------------------------|---------------------------------------------------------------------|----------------------------------------|
| Cu/ <i>t</i> -ZrO <sub>2</sub> | 40.2                         | 261                                                                 | 2.6                                    |
| Cu/ <i>m</i> -ZrO <sub>2</sub> | 38.3                         | 248                                                                 | 2.7                                    |

<sup>a</sup>N<sub>2</sub>O reactive chemisorption.

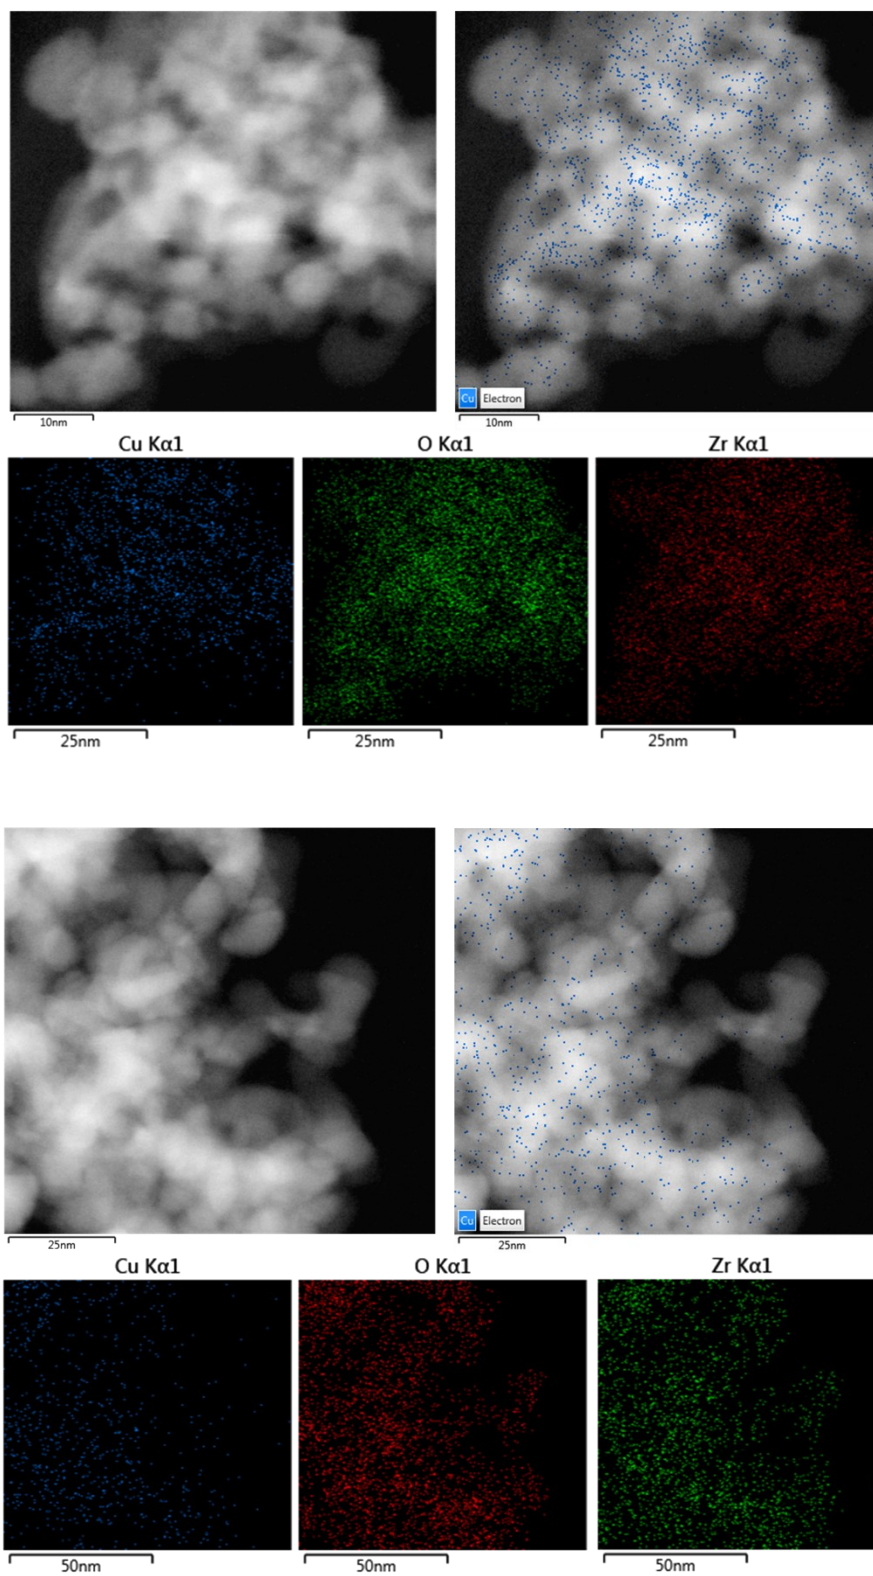

**Figure S6.** Elemental maps of (top) Cu/*t*-ZrO<sub>2</sub> and (bottom) Cu/*m*-ZrO<sub>2</sub> determined by EDS.

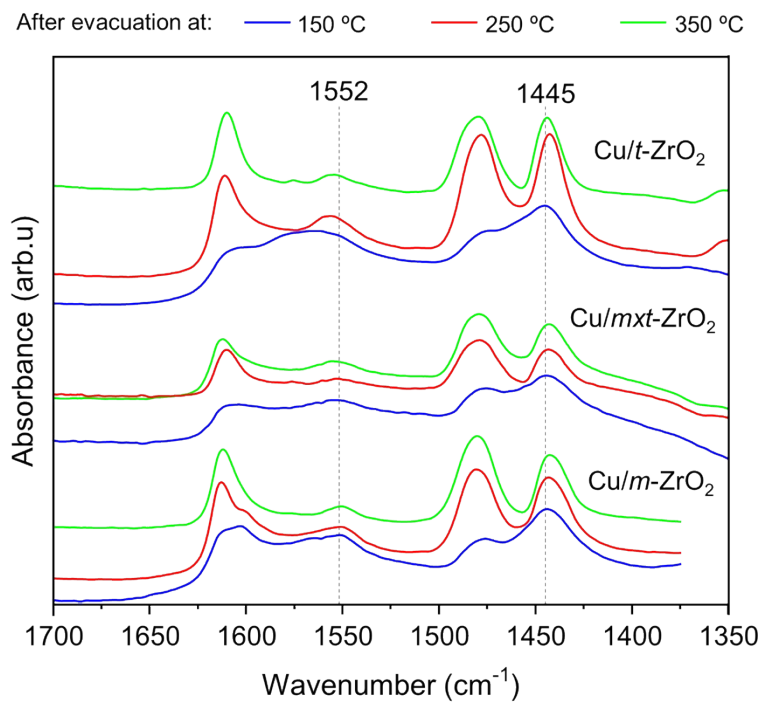

**Figure S7.** FTIR spectra of chemisorbed pyridine on Cu/ZrO<sub>2</sub>. Band assignment: Brønsted acid sites, 1547-1540  $\text{cm}^{-1}$ ; Lewis acid sites, 1452-1445  $\text{cm}^{-1}$ .<sup>[2,3]</sup>

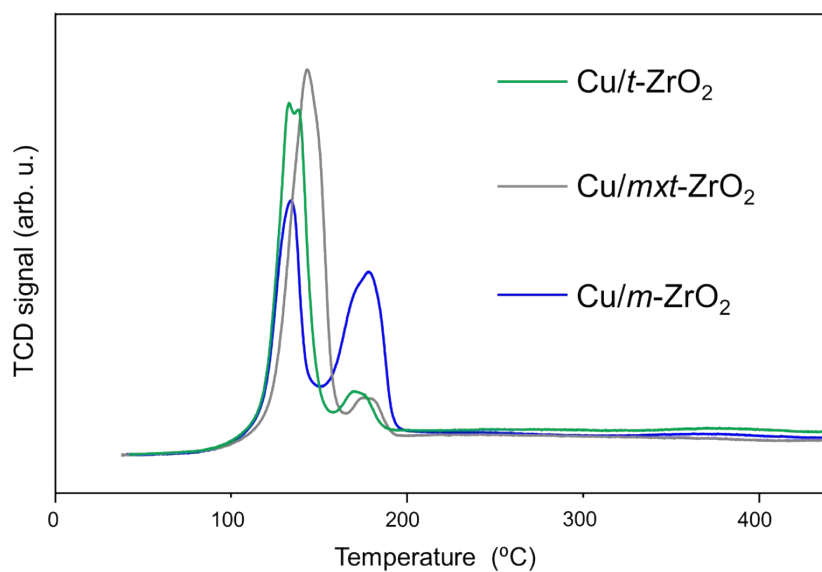

**Figure S8.** H<sub>2</sub> temperature-programmed reduction (TPR) profiles for Cu/ZrO<sub>2</sub>. Conditions: 50 mL/min H<sub>2</sub> (10 vol% in Ar), ramp rate 10  $^{\circ}\text{C}/\text{min}$ .

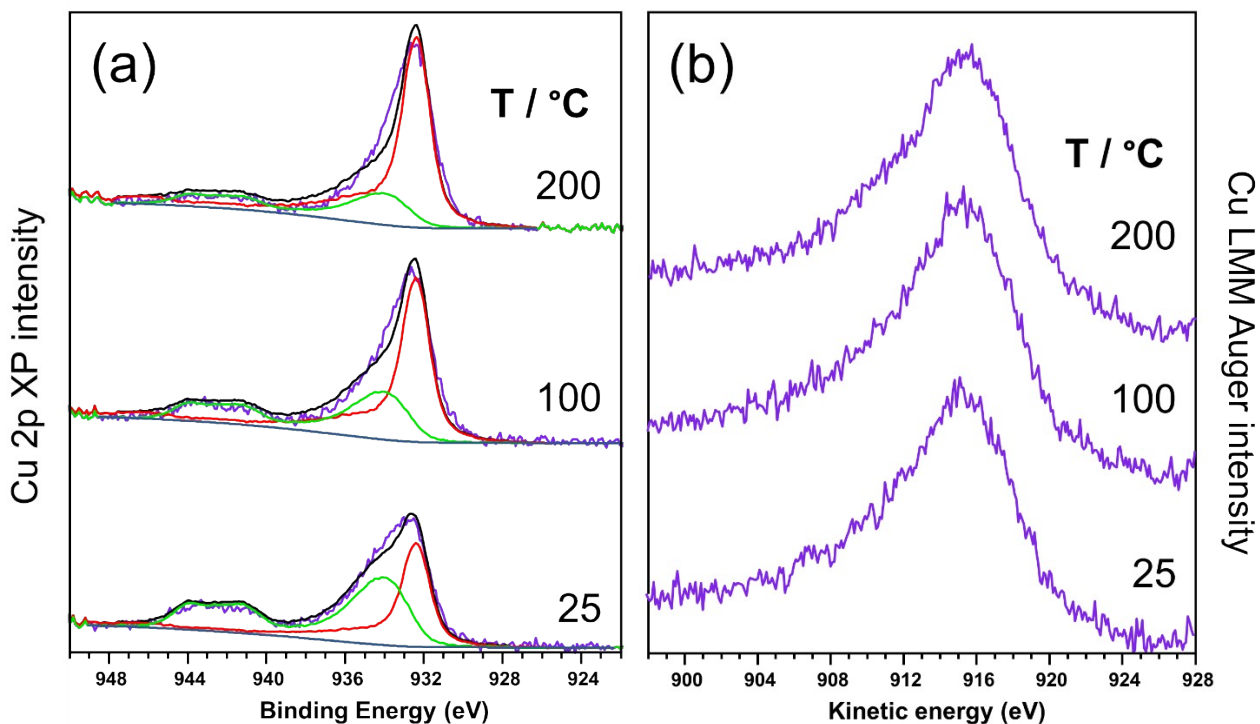

**Figure S9.** (a) Cu  $2p_{3/2}$  XP and (b) Cu LMM Auger spectra of Cu/*t*-ZrO<sub>2</sub> wet-impregnated with a MeOH:Glycerol (50:50 wt) mixture as a function of in-situ annealing temperature.

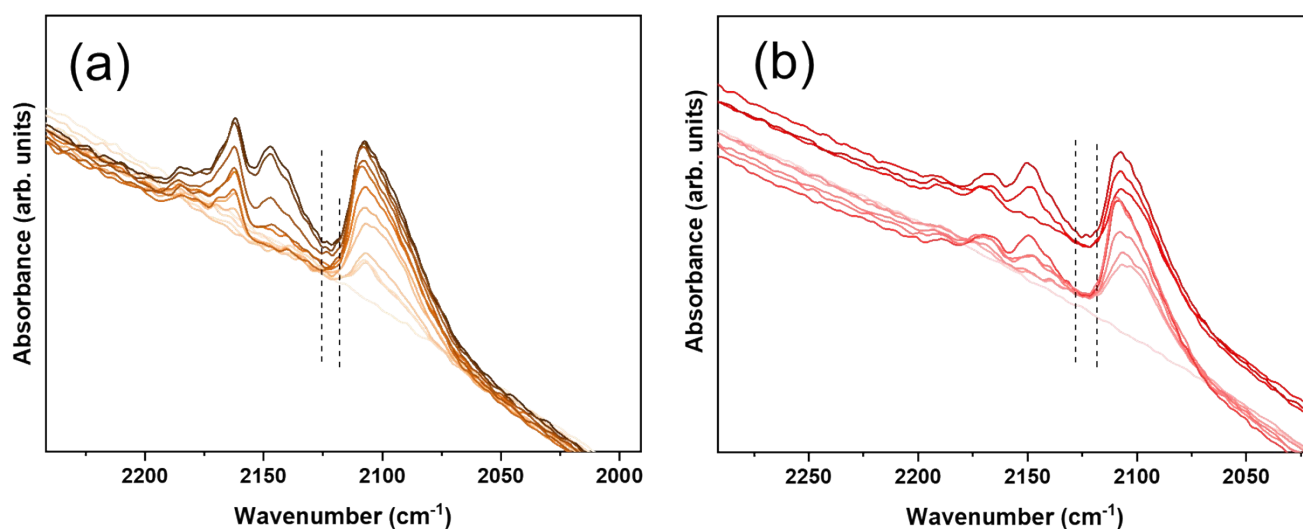

**Figure S10.** FTIR of chemisorbed CO at different coverages following N<sub>2</sub>O titration as described in *Section 2.3.4*, to determine the stoichiometry of the Cu<sup>0</sup> oxidation by N<sub>2</sub>O (section in between dashed lines corresponding to Cu<sub>2</sub>O–CO).



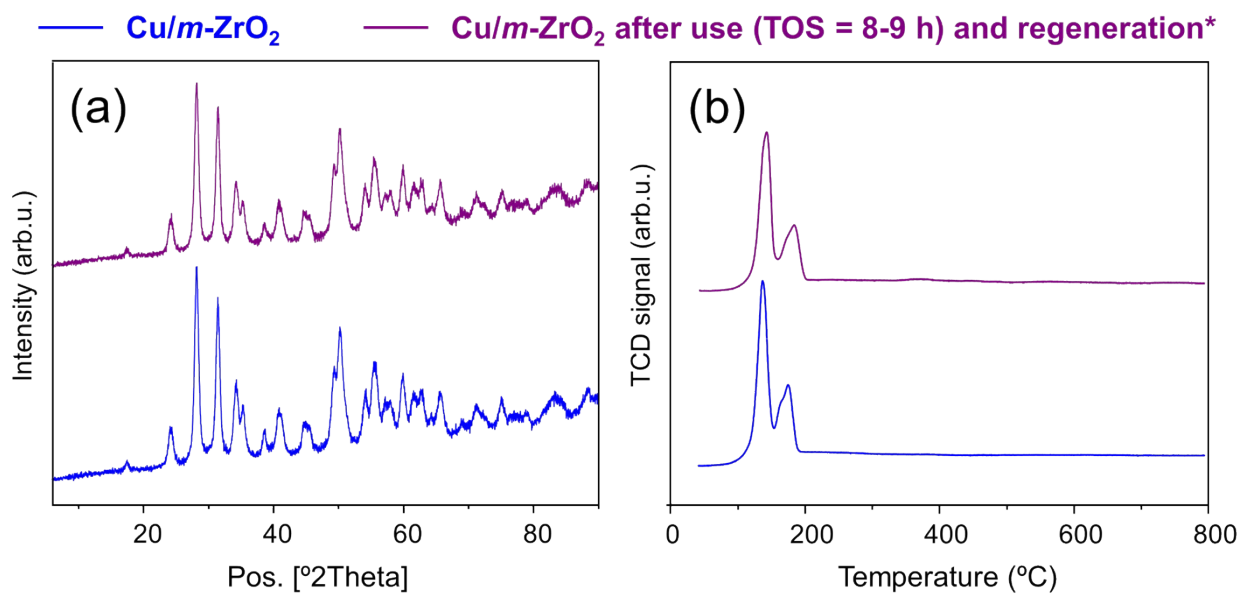

**Figure S11.** (a) Powder XRD patterns, and (b)  $\text{H}_2$  TPR profiles for as-prepared (blue) and post-reaction and regenerated (purple)  $\text{Cu}/m\text{-ZrO}_2$ . \*Regeneration involved washing with 40 mL of MeOH (2 mL/h) in the same reactor at the reaction temperature, then calcination at 550  $^\circ\text{C}$  for 4 h under flowing air (3  $^\circ\text{C}/\text{min}$ , 50 mL/min).

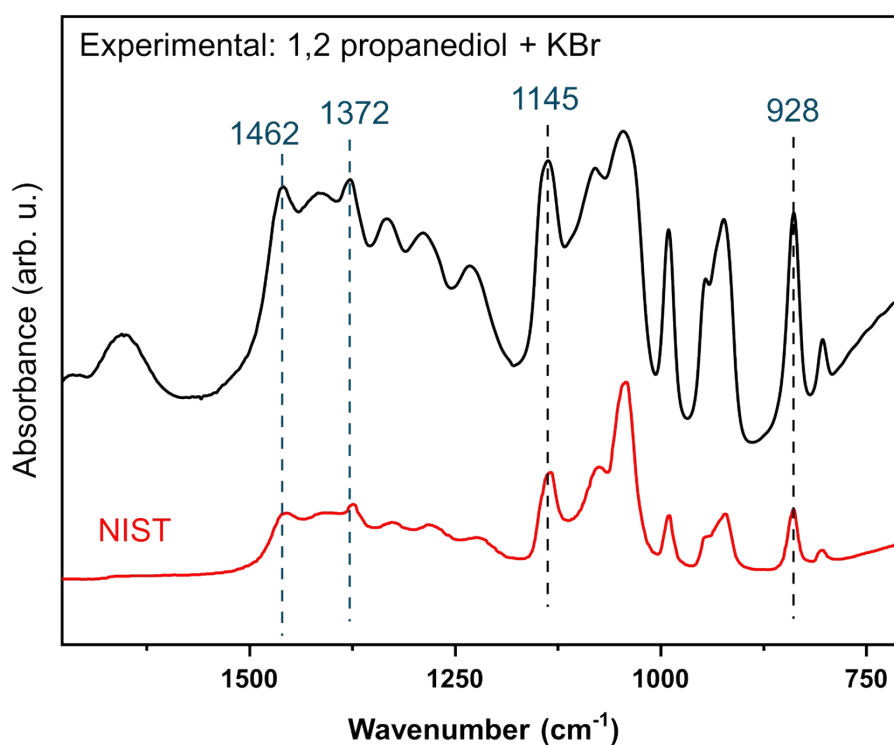

**Figure S12.** Experimental versus reference FTIR spectra of 1,2-propanediol.



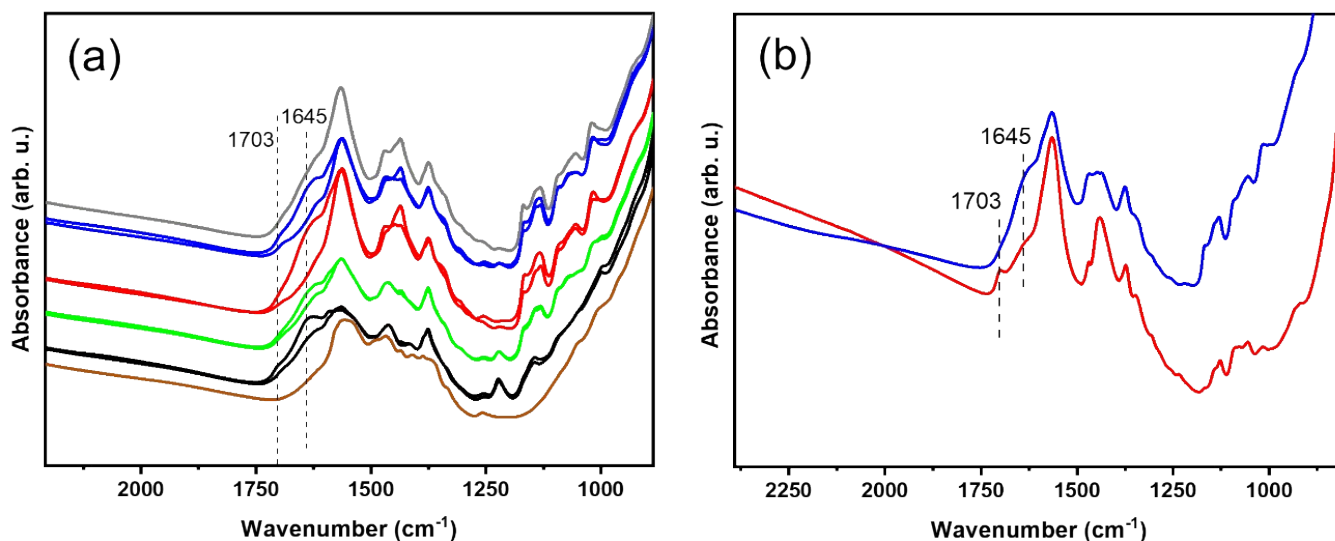

**Figure S13.** (a) FTIR spectra of *m*-ZrO<sub>2</sub> (**brown**) and adsorbed 1,2-propanediol on *m*-ZrO<sub>2</sub> (**black**). Additional spectra are shown for 1,2-propanediol on *m*-ZrO<sub>2</sub> in-vacuo annealed (10<sup>-6</sup> mbar) to 25 °C (**green**), 60 °C (**blue**), 120 °C (**red**) or 160 °C (**grey**). In all cases, samples were cooled to room temperature before spectral acquisition. (b) FTIR spectra of adsorbed 1,2-propanediol on *m*-ZrO<sub>2</sub> (**blue**) and Cu/*m*-ZrO<sub>2</sub> (**red**) after in-vacuo annealing at 160 °C and cooling to room temperature.

**Table S3.** XP and AE spectroscopy data for quasi-in-situ experiments with Cu/*m*-ZrO<sub>2</sub> catalyst to study the influence of water.

| Experiment                                          | Cu 2p <sub>3/2</sub><br>maxima<br>(B.E., eV) | Cu L <sub>3</sub> M <sub>45</sub> M <sub>45</sub><br>maxima<br>(K.E., eV) | α <sup>a</sup> (eV) | Cu <sup>1+/0</sup> : Cu <sup>2+</sup> |
|-----------------------------------------------------|----------------------------------------------|---------------------------------------------------------------------------|---------------------|---------------------------------------|
| Gly/Water + Cu/ <i>m</i> -ZrO <sub>2</sub> (R.T.)   | 934.0                                        | 915.3                                                                     | 1849.3              | 16 : 84                               |
| Gly/Water + Cu/ <i>m</i> -ZrO <sub>2</sub> (100 °C) | 932.4                                        | 915.3                                                                     | 1847.7              | 61 : 39                               |
| Gly/Water + Cu/ <i>m</i> -ZrO <sub>2</sub> (200 °C) | 932.5                                        | 915.3                                                                     | 1847.8              | 78 : 22                               |
| Gly/MeOH + Cu/ <i>m</i> -ZrO <sub>2</sub> (R.T.)    | 934.2                                        | 915.5                                                                     | 1849.7              | 15 : 85                               |
| Gly/MeOH + Cu/ <i>m</i> -ZrO <sub>2</sub> (100 °C)  | 932.6                                        | 915.4                                                                     | 1848.0              | 69 : 31                               |
| Gly/MeOH + Cu/ <i>m</i> -ZrO <sub>2</sub> (200 °C)  | 932.5                                        | 915.4                                                                     | 1847.9              | 91 : 9                                |

<sup>a</sup>Auger parameter: Cu 2p<sub>3/2</sub> XPS binding energy + Cu L<sub>3</sub>M<sub>45</sub>M<sub>45</sub> AES kinetic energy.

## References

1. C. Perego, S. Peratello, *Catal. Today*, 52 (2-3) (1999), pp. 133-145.
2. K. Nakajima, J. Hirata, M. Kim, N.K. Gupta, T. Murayama, A. Yoshida, N. Hiyoshi, A. Fukuoka, W. Ueda, *ACS Catal.* 8 (1) (2018), pp. 283–290.
3. K. Samson, M. Śliwa, R.P. Socha, K. Góra-Marek, D. Mucha, D. Rutkowska-Zbik, J-F. Paul, M. Ruggiero-Mikołajczyk, R. Grabowski, J. Słoczyński, *ACS Catal.* 10 (4) (2014), pp. 3730–3741.
